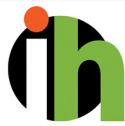

**CALL FOR IMMUNOLOGY EDUCATION PAPERS!**

Visit [ImmunoHorizons.org](https://immunohorizons.org) for more information!

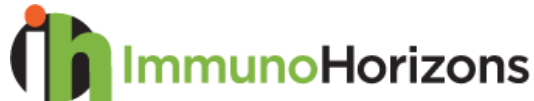

RESEARCH ARTICLE | MARCH 20 2023

## **Effect of a Fructose-Rich Diet on Gut Microbiota and Immunomodulation: Potential Factors for Multiple Sclerosis**

Stephanie R. Peterson; ... et. al

*Immunohorizons* (2023) 7 (3): 213–227.

<https://doi.org/10.4049/immunohorizons.2300008>

### **Related Content**

Binding Studies on Heavy-Light Chain Recombinant Hybrid Immunoglobulins a Derived from Murine Myeloma Anti-Fructofuranans

*J Immunol* (February,1978)

Fermentable Dietary Fiber Promotes Helminth Infection and Exacerbates Host Inflammatory Responses

*J Immunol* (June,2020)

# Effect of a Fructose-Rich Diet on Gut Microbiota and Immunomodulation: Potential Factors for Multiple Sclerosis

Stephanie R. Peterson,\* Soham Ali,<sup>†</sup> Rachel L. Shrode,<sup>‡</sup> and Ashutosh K. Mangalam<sup>\*,†,§,¶</sup>

\*Immunology Graduate Program, University of Iowa, Iowa City, IA; <sup>†</sup>Carver College of Medicine, University of Iowa, Iowa City, IA; <sup>‡</sup>Informatics Graduate Program, University of Iowa, Iowa City, IA; <sup>§</sup>Department of Pathology, University of Iowa Hospitals and Clinics, Iowa City; and <sup>¶</sup>Iowa City VA Health System, Iowa City, IA

## ABSTRACT

Multiple sclerosis (MS) is an autoimmune demyelinating disease of the CNS that is linked with both genetic and environmental factors. A Western-style diet rich in fat and simple sugars is hypothesized as a potential factor contributing to the increased incidence of inflammatory autoimmune diseases, such as MS, in developed countries. Although the adverse effects of a high-fat diet in MS have been studied extensively, the effect of a fructose-rich diet (FRD) on MS etiology is unknown. We hypothesized that an FRD will alter the gut microbiome, influence immune populations, and negatively impact disease in experimental autoimmune encephalomyelitis (EAE), an animal model of MS. To test this, we fed C57BL/6 mice either an FRD or normal feed for 4 or 12 wk and analyzed the effect of an FRD on gut microbiota, immune populations, and EAE. An FRD significantly influenced the gut microbiota, with reduced abundance of beneficial bacteria and enrichment of potentially proinflammatory bacteria. We also observed immune modulation in the gut and periphery. Of particular interest was a population of Helios<sup>+</sup>ROR $\gamma$ t<sup>+</sup>Foxp3<sup>+</sup>CD4<sup>+</sup> T cells that was enriched in the small intestine lamina propria of FRD-fed mice. However, despite gut microbiota and immune modulations, we observed only a subtle effect of an FRD on EAE severity. Overall, our data suggest that in C57BL/6J mice, an FRD modulates the gut microbiota and immune system without significantly impacting myelin oligodendrocyte glycoprotein 35–55/CFA-induced EAE. *ImmunoHorizons*, 2023, 7: 213–227.

## INTRODUCTION

Multiple sclerosis (MS) is an autoimmune demyelinating disease of the CNS that affects an estimated 2.8 million people globally, with prevalence rates rising nearly 10% in the last 30 y (1). Current understanding of the disease suggests that it is initiated primarily by autoreactive Th17/Th1 CD4<sup>+</sup> T cells

that are activated in the periphery before infiltrating the CNS and causing damage to the myelin sheath around nerve axons (2). Both genetic and environmental factors have been linked with susceptibility to MS, but the initiating event resulting in the induction of autoreactive T cell activation in MS is unknown. Recently, diet and the gut microbiome have emerged as important environmental factors that may play a major role in

Received for publication February 22, 2023. Accepted for publication February 22, 2023.

**Address correspondence and reprint requests to:** Dr. Ashutosh K. Mangalam, Department of Pathology, University of Iowa Carver College of Medicine, 25 South Grand Avenue, 1080A ML, Iowa City, IA 52242. E-mail address ashutosh-mangalam@uiowa.edu

ORCID: 0000-0001-8788-0984 (R.L.S.); 0000-0002-9926-2531 (A.K.M.).

This work was supported by the National Institutes of Health/National Institute of Allergy and Infectious Diseases Grant 1R01AI137075 (to A.K.M.), Veteran Affairs Merit Award 1I01CX002212 (to A.K.M.), University of Iowa Environmental Health Sciences Research Center, National Institute on Environmental Health Sciences/National Institutes of Health Grant P30 ES005605 (to A.K.M.), a gift from P. Heppelmann and M. Wacek to A.K.M., and by a Carver Trust Pilot Grant (to A.K.M.). S.R.P. was supported by National Institutes of Health Institutional Training Grant T32AI007485. S.A. was supported by the Emory Warner Fellowship, which provides medical students at the Carver College of Medicine the opportunity to take a full year out of their medical school curriculum to work in a laboratory in the University of Iowa Department of Pathology. R.L.S. was supported by the University of Iowa Informatics Fellowship and by National Institutes of Health T90 Oral Health Training Grant 5T90DE023520.

The shotgun metagenomic sequences presented in this article have been submitted to the National Center for Biotechnology Information Sequence Read Archive under accession number PRJNA939184.

**Abbreviations used in this article:** B6, C57BL/6J; EAE, experimental autoimmune encephalomyelitis; FRD, fructose-rich diet; MHC II, MHC class II; MOG, myelin oligodendrocyte glycoprotein; MS, multiple sclerosis; ND, normal diet; PTX, pertussis toxin; RA, rheumatoid arthritis; ROR $\gamma$ t, retinoic acid–related orphan receptor  $\gamma$ t; Treg, T regulatory cell; tSNE, t-distributed stochastic neighbor embedding.

This article is distributed under the terms of the [CC BY-NC 4.0 Unported license](https://creativecommons.org/licenses/by-nc/4.0/).

Copyright © 2023 The Authors

<https://doi.org/10.4049/immunohorizons.2300008>

ImmunoHorizons is published by The American Association of Immunologists, Inc.

modulating susceptibility to disease occurrence and progression (3–5).

Previous studies have suggested that changes in diet can have either beneficial or detrimental effects on MS, based on the contents of those diets. Western diets, which are high in fat, sugar, salt, and processed foods, are often associated with inflammatory autoimmune diseases, including MS (6, 7). In the United States, consumption of fast food or other high-fat, high-carbohydrate diets, including increased addition of fructose or high-fructose corn syrup in these foods, is common (8). Studies have suggested that increased fructose consumption can exacerbate disease in multiple conditions, including nonalcoholic fatty liver disease, breast cancer, hypertension, and metabolic syndrome. This exacerbation is thought to be mediated through various mechanisms such as creation of metabolic byproducts, increased visceral adiposity, and nutritional regulation of gluconeogenesis and de novo lipogenesis (9–13). Additionally, fructose has been associated with gut microbiome dysbiosis and dyslipidemia, which may be detrimental to overall health (14, 15).

Although evidence shows the adverse effect of elevated fructose intake in multiple diseases, there are few data on the impact of fructose on the pathobiology of MS. Due to the dietary prevalence of fructose in areas where autoimmune inflammatory disease incidence is higher, and its own associations with inflammatory conditions, it has been suggested that fructose may be detrimental in the context of MS as well (1). Thus, this study was designed to determine the effects of high fructose intake on the gut microbiome, immune system, and MS disease outcomes, using the experimental autoimmune encephalomyelitis (EAE) mouse model of MS.

## MATERIALS AND METHODS

### Mice and dietary treatments

C57BL/6J (B6) male mice (4–6 wk old) were purchased from The Jackson Laboratory (Bar Harbor, ME) and allowed to adjust to the new environment for 1–2 wk. Mice were fed the indicated diet, a fructose-rich diet (FRD; 649.19 g/kg or 70% kcal of diet; Envigo TD.180864) or normal feed, ad libitum for 4 or 12 wk. Normal feed is the standard mouse chow available in the animal facilities at the University of Iowa (Envigo 7013). In some experiments, mice were given fructose-supplemented water (30% w/v fructose) in combination with normal feed or normal water in combination with a normal or FRD ad libitum for 6 wk. All procedures were done according to the Institutional Animal Care and Use Committee guidelines at the University of Iowa.

### Shotgun metagenomic sequencing

Fecal samples were collected from individual mice using a divider box as described by Shahi et al. (16). Fecal samples were homogenized using an Omni Bead Ruptor system, and DNA was isolated using the Qiagen DNeasy PowerLyzer PowerSoil kit following the manufacturer's instructions. Isolated DNA samples were quantified using Qubit (Qiagen) before being sent

to CosmosID (Rockville, MD) for shotgun metagenomic sequencing. Raw sequences were quality controlled using metaWRAP to analyze read quality, trim adapters, and remove host sequences (17). Then, the KRAKEN2 database was used to identify the taxonomy by the k-mer method (18). After assignment, BRAKEN, a Bayesian-based tool, was used for abundance refinement based on the KRAKEN2 output (19). Next, we used *bit* to combine the BRAKEN abundances and add lineage, finally resulting in a complete taxonomy abundance table (20).

### Microbiota analysis

The taxonomy abundance table was analyzed using R (v4.0.3) packages *vegan* and *ggpubr* (21, 22). Downstream analysis of the microbiome taxonomy abundance table was also performed in R v4.1.2 using the MicroVis package (23). Samples first had to meet a threshold of 10,000 reads, and then they were normalized by sum scaling and geometric log transformation. Features with unassigned domains, prevalence less than one, or relative abundance less than  $1 \times 10^{-4}$  were removed. The  $\alpha$  diversity was calculated using a nonparametric analysis method, the Chao1 index. Bray–Curtis dissimilarity was calculated as a measure of  $\beta$  diversity using the PERMANOVA “adonis” function for statistical analysis. Univariate analysis was performed to measure the variability of specific species and genera between the ND and FRD groups using Wilcoxon rank sum tests corrected for multiple comparisons via the Benjamini–Hochberg method. Random forest analysis was performed at the genus level as a measure of group differentiation, which includes training a random forest model followed by use of the Boruta algorithm to identify statistically significant features for group placement prediction (24). The default parameters of  $p < 0.01$  with 500 trees for 100 iteration were used.

### Cell isolation and flow cytometry

Lamina propria cells were isolated as previously described (25). Briefly, small intestine or colonic tissue was harvested from the mouse, the fecal matter was removed, and the tissue was cut longitudinally. The mucus layer was removed by shaking using Buffer A (HBSS + 5% FBS + 25mM HEPES) until the supernatant was clear after shaking, usually 1–2 buffer replacements. The tissue was then rinsed once with shaking using buffer B (HBSS + 2 mM EDTA + 25 nM HEPES). Epithelial cells were dissociated by incubation with shaking in buffer C (HBSS + 15 mM HEPES + 5 mM EDTA + 10% FBS + 1 mM DTT). Epithelial cells were removed by shaking with buffer A until the supernatant cleared, generally one to two buffer replacements. Immune cells were liberated by incubation with shaking in digestion buffer (complete RPMI 1640 + 1.5 mg/ml collagenase IV [Worthington Biochemical, Lakewood, NJ] + 40  $\mu$ g/ml DNase [Roche Diagnostics, Mannheim, Germany]), and then the cell suspension was passed through 70- and 40- $\mu$ m filters to reach a single-cell suspension. Splenic cells were obtained by harvesting and homogenizing mouse spleens. Erythrocytes were then lysed and the remaining cells were resuspended

to create a single-cell suspension. To determine cell surface marker expression, cells were incubated with mAbs at 4°C for 30 min before fixation and analysis by flow cytometry. To determine intracellular marker/transcription factor expression, cells were stained for surface markers, fixed, and permeabilized using a Foxp3/transcription factor staining buffer set (eBioscience, San Diego, CA), and incubated with mAbs at room temperature for 20 min before analysis by flow cytometry (26). All flow cytometry data were collected using a Cytex Aurora (Cytex, Fremont, CA) and analyzed using the FlowJo *t*-distributed stochastic neighbor embedding (tSNE) package (FlowJo, Ashland, OR) with down-sampling of CD45<sup>+</sup> cells prior to tSNE analysis to normalize populations between samples (27).

### EAE disease induction and evaluation

EAE was induced and evaluated as described previously (28). Briefly, mice were immunized s.c. on day 0 on the left and right flanks with 100 µg of myelin oligodendrocyte glycoprotein (MOG)<sub>35–55</sub> peptide emulsified in 200 µg of CFA, followed by 80 ng of pertussis toxin (PTX) diluted in PBS i.p. on days 0 and 2. Disease severity was scored as follows: 0, no symptoms; 1, loss of tail tonicity; 2, hindlimb weakness; 3, hindlimb paralysis; 4, forelimb weakness; 5, moribund or death.

### Data availability

The shotgun metagenomic sequences were deposited to the National Center for Biotechnology Information Sequence Read Archive under the BioProject ID: PRJNA939184 for free public access. All other data needed to evaluate the conclusions in this study are present in the manuscript.

### Statistical analysis

All microbiome statistical analyses were performed using built-in functions of the MicroVis R package in R studio. Briefly,  $\beta$  diversity was analyzed by the PERMANOVA adonis function, univariate analyses used Wilcoxon rank tests with Benjamini–Hochberg corrections for multiple comparisons, and random forest analysis used random forest model training of 500 trees with 100 iterations with the Boruta algorithm to identify significant features. A false discovery rate of  $q < 0.01$  was considered significant for univariate analyses, and  $p < 0.01$  was considered significant for random forest analysis. EAE and immune population variations were analyzed by two-way ANOVA using GraphPad Prism software (GraphPad Software, La Jolla, CA). A  $p$  value  $< 0.05$  was considered significant for these tests.

## RESULTS

### Effect of an FRD on gut microbiome composition

It is well documented that various diets can modulate the composition of the gut microbiome in mice and humans (26, 29–32). Therefore, we hypothesized that an FRD would also alter the mouse gut microbiome. To address this, we placed mice on an FRD for 6 wk, followed by fecal sample collection and shotgun

metagenomic sequencing (Fig. 1). First, we analyzed  $\alpha$  diversity by Chao1 analysis, a measure of the estimated number of species in the bacterial community of each mouse. Bray–Curtis dissimilarity analysis of  $\beta$  diversity was then performed to measure the overall differences in bacterial species composition between each dietary group. Using these methods, we were able to determine that feeding mice an FRD does alter the gut microbiome composition in those mice compared with normal diet (i.e., normal feed) (ND)-fed controls, although the  $\alpha$  diversity remained similar between the groups (Fig. 1B, 1C). Next, we investigated alterations in the relative abundance of genera and species in FRD- or ND-fed mice using proportional (Fig. 1D) and relative abundance (Fig. 1E) to visualize these alterations. These methods revealed shifts in several genera and species. In FRD-fed mice, enriched genera included *Bacteroides* and *Lactococcus*, whereas *Muribaculum* and *Duncaniella* were depleted (Fig. 1D). At the species level, enriched taxa included *Bacteroides vulgatus*, *Desulfovibrio vulgaris*, and *Collinsella aerofaciens*, and reduced taxa included several *Prevotella* species. Using univariate analysis, we identified 50 species and 26 genera, at a false discovery rate of  $q < 0.01$ , which were altered in FRD-fed mice compared with ND-fed controls (Fig. 2). Notably, *Prevotella* was again reduced in FRD-fed mice and *Collinsella* was enriched. Taken together, these data suggest that an FRD can modulate the gut microbiome with enhanced or reduced abundance of multiple bacterial genera and species.

### Random forest analysis to determine gut microbiome classification

We then used random forest analysis to determine which bacterial classes and genera were most useful in differentiating FRD-fed mice from ND-fed mice (Fig. 3). Random forest analysis uses machine learning to train a random forest model and then uses the Boruta algorithm model to identify bacterial genera or species that are most significant in categorizing a sample into either the FRD- or ND-fed group. This analysis revealed several genera and species that could be used to distinguish between the groups, including *Prevotella*, *Collinsella*, and *Faecalibaculum*. Of these, *Prevotella* had a reduced abundance in FRD-fed mice, whereas *Collinsella* and *Faecalibaculum* had an enriched abundance in FRD-fed mice. Thus, random forest analysis was able to identify both enriched and reduced bacteria that significantly aid in classifying samples to a particular diet, suggesting that both upregulation and downregulation of bacterial genera and species are important factors in FRD-induced gut dysbiosis.

### Effect of an FRD on immune populations in the intestinal lamina propria

Changes in the gut microbiota can influence the immune response along the intestinal mucosal barrier and can lead to systemic changes in the immune response (26, 33). Western-style diets have been shown to alter microbiota and inflammatory responses in the gut and beyond (33–35). As fructose is a component of a Western-style diet and can modulate the gut microbiome, we wanted to

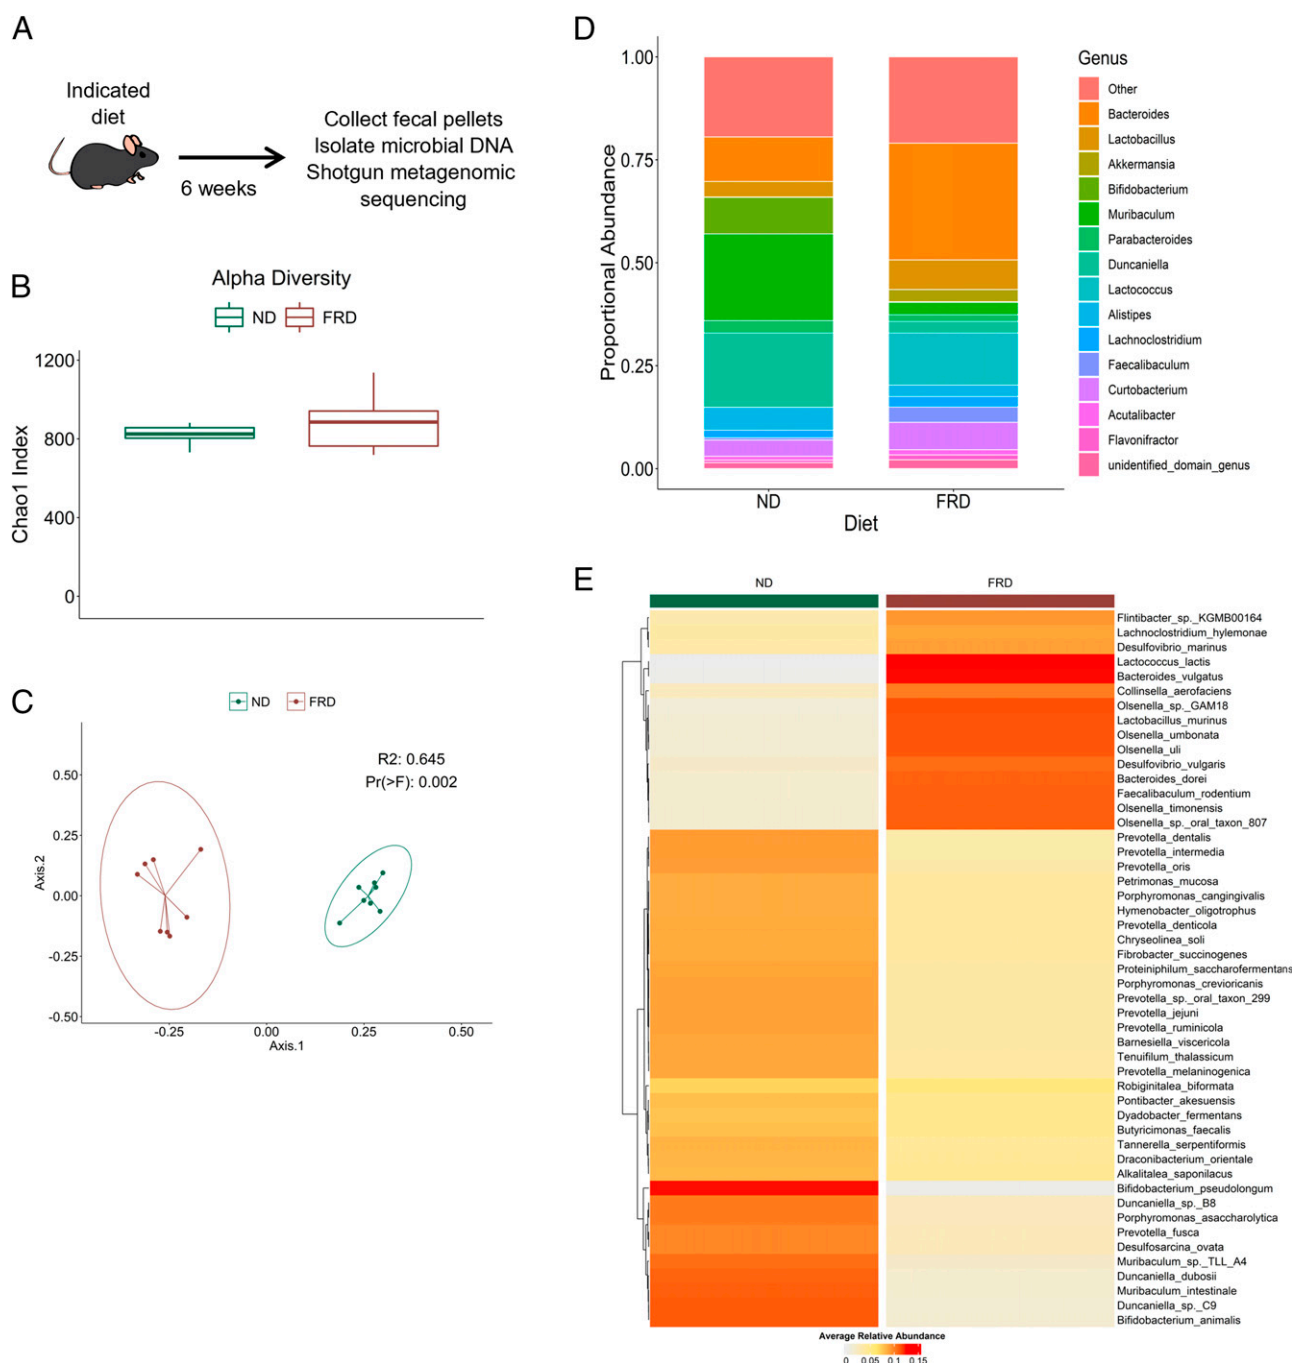

**FIGURE 1. An FRD can modulate the composition of the gut microbiome.**

Four- to 6-wk-old B6 mice were fed an FRD or ND for 6 wk before fecal pellets were collected, microbial DNA was isolated, and shotgun metagenomic analysis was performed. (A) Schematic of the experimental procedure. (B) Chao1  $\alpha$  diversity of the mice in each group. (C) Bray–Curtis dissimilarity measure of  $\beta$  diversity within each diet group displayed using a principal coordinate analysis plot. Each dot represents a single mouse. (D) Stacked bar plots visualizing alterations in relative abundance of the top 20 bacterial genera in each diet group. Genera depicted represent 79.9% of bacterial genera in each group. (E) Heatmap depicting the relative abundance of bacterial species at  $\alpha = 0.01$  in both dietary groups. Each column represents a single mouse.  $n = 8$  per group, two cages per diet. Values are representative of one independent experiment.

investigate whether an FRD can modulate the immune system in the gut and how that modulation may change over time. Therefore, we analyzed immune marker expression by flow cytometry

on mononuclear cells isolated from the lamina propria of mice fed an FRD for 4 or 12 wk (Fig. 4). Using tSNE and FlowSOM analyses, we were able to identify several populations of immune cells



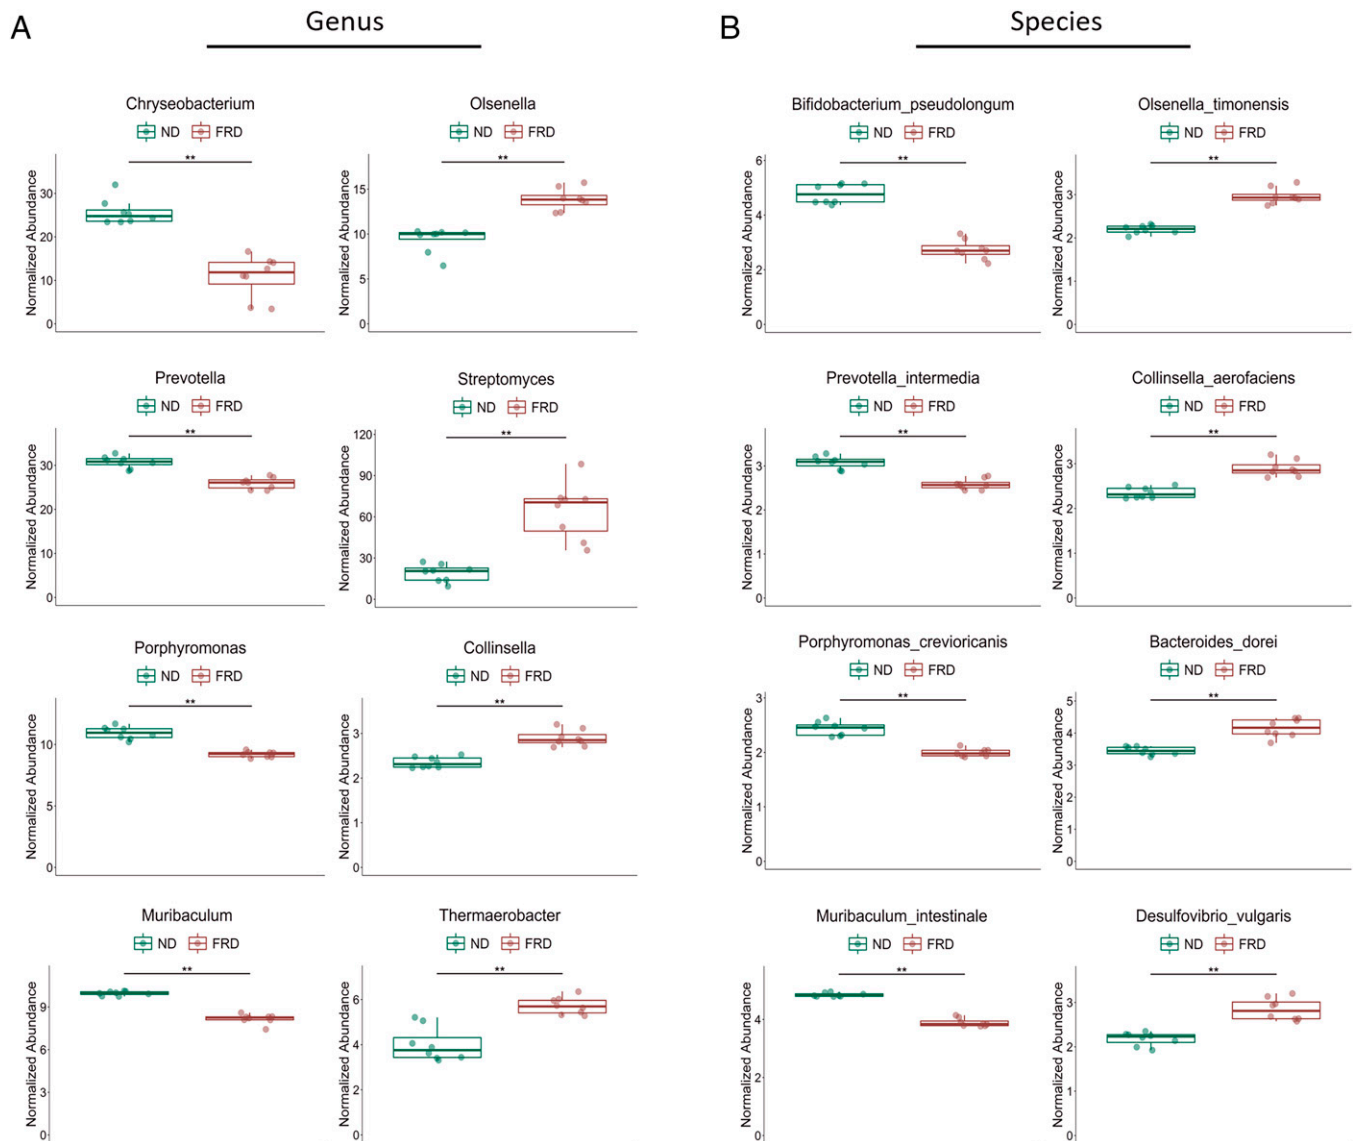

**FIGURE 2. An FRD can modulate specific bacterial genera in the microbiome.**

Four- to 6-wk-old B6 mice were fed an FRD or ND for 6 wk before fecal pellets were collected, microbial DNA was isolated, and shotgun metagenomic analysis was performed. **(A and B)** Univariate analysis of bacterial genera (A) and species (B) abundance in ND- and FRD-fed mice.  $n = 8$  per group, two cages per diet. \*\* $p < 0.01$ .

that were altered only in mice on an FRD (Fig. 4B). tSNE analysis is a nonlinear dimensionality reduction tool that prioritizes preserving local structure during the dimension reduction such that phenotypically similar data points and populations will be displayed near each other and dissimilar points and populations will be farther away (36). FlowSOM is a clustering algorithm that aids in visualization and analysis of high-dimensional datasets. It utilizes self-organizing maps to train the program with the provided dataset before assigning each data point to nodes in a minimum spanning tree, which are finally labeled as clusters within the dataset (37).

Interestingly, in the ileal lamina propria, an MHC class II (MHC II)<sup>+</sup> B cell subset was enriched after 4 wk of an FRD, but

it returned to an intermediate level at 12 wk. However, CD103<sup>+</sup> CD11a<sup>+</sup> CD4<sup>+</sup> T cells were reduced after both 4 and 12 wk of an FRD. Another notable shift occurred in the T regulatory cell (Treg) population after 4 and 12 wk of an FRD, with a significant enrichment of Helios<sup>+</sup> retinoic acid-related orphan receptor  $\gamma$ t (ROR $\gamma$ t)<sup>+</sup> Foxp3<sup>+</sup> Tregs. The number of Helios<sup>+</sup> Tregs stayed consistent and did not express ROR $\gamma$ t at any time point (Fig. 4D, 4E). The colon is an area of high microbiome load, and fecal microbiome sequencing showed a distinct profile in mice on an FRD. Thus, we hypothesized that there would be alterations in immune populations in that tissue. After 4 and 12 wk of an FRD, we found an enriched population of CD4<sup>+</sup> T cells with high GITR expression as well as increased numbers of CD8<sup>+</sup> T cell subsets

**FIGURE 3. Algorithm-based method reveals unique microbial identifiers in microbiomes shaped by an FRD or ND.**

Four- to 6-wk-old B6 mice were fed an FRD or ND for 6 wk before fecal pellets were collected, microbial DNA was isolated, and shotgun metagenomic analysis was performed. (A and B) Random forest analysis at (A) genus and (B) species levels. Green indicates higher confidence in utilizing the indicated bacteria to blindly differentiate between diets.  $n = 8$  per group, two cages per diet.

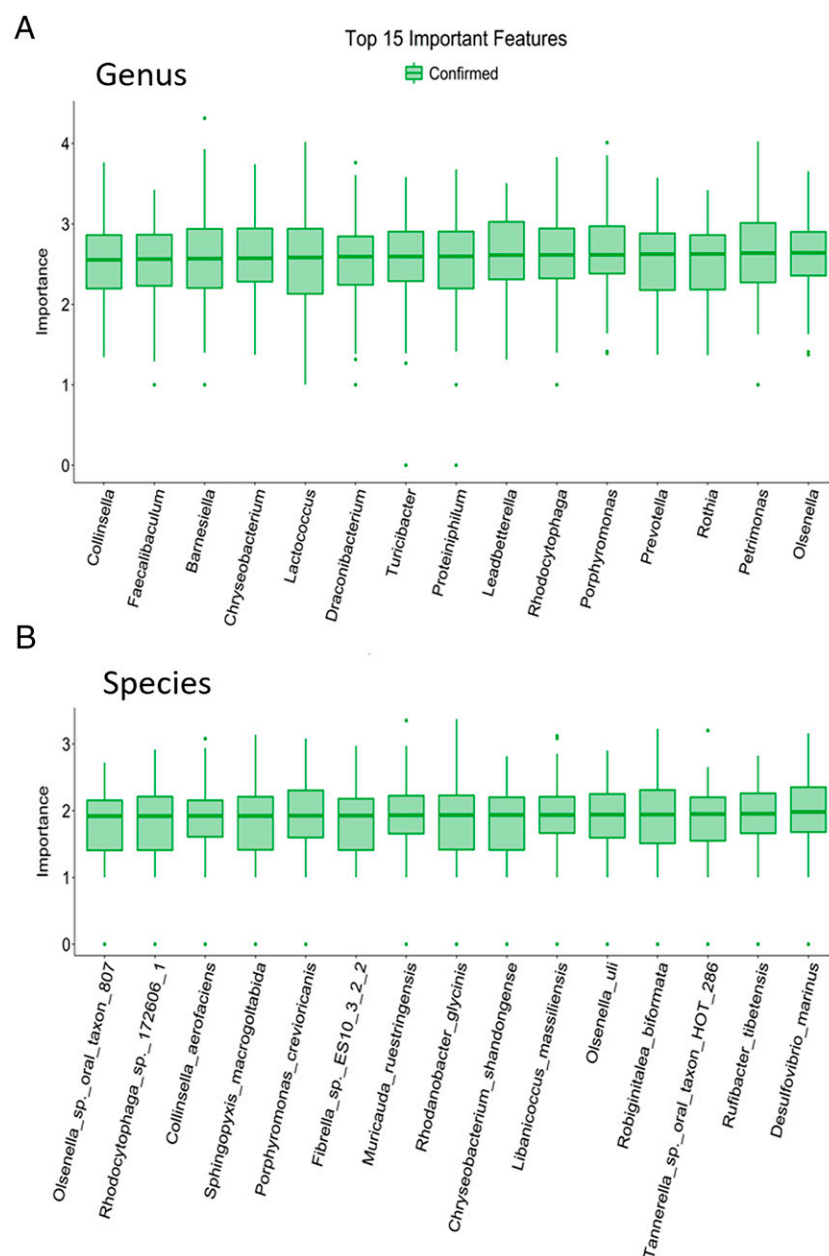

such as  $CD103^+CD8^+$  T cells in FRD-fed mice (Fig. 5). There was also a population of potential dendritic cells or other innate cells expressing CD11b, CD11c, MHC II, and CD49d that was reduced after 4 wk of an FRD and stayed lower after 12 wk of the diet (Fig. 5B–D). Thus, these data suggest that an FRD can modulate immune populations in both the ileal and colonic lamina propria.

#### Effect of an FRD on immune populations in the periphery

We also examined immune populations in the spleen to determine whether an FRD impacts immune populations outside the initial uptake area (Fig. 6). There were increased numbers of  $CD8^+$  T cell subsets such as  $CD49d^+CD8^+$  T cells in the spleen of 4 wk FRD-fed mice, but not 12 wk FRD-fed mice. There was also a population of  $CD19^+MHC\ II^{lo}$  B cells that were initially

reduced after 4 wk on an FRD, but appeared at higher than ND levels in mice fed an FRD for 12 wk (Fig. 6B–D). Taken together, these data suggest that an FRD can modulate immune populations beyond the intestinal lamina propria.

#### Effect of an FRD on EAE disease severity

Due to an FRD modulating both gut microbiota as well as intestinal and peripheral immune responses, we next asked whether an FRD can modulate EAE disease severity. To do this, we placed mice on either an FRD or ND for 4 or 12 wk before inducing EAE via MOG<sub>35–55</sub>/CFA immunization and tracking clinical disease scores (Fig. 7B). We observed that onset for all three diet groups was the same, with disease onset at day  $9 \pm 1$  d. Peak disease for all groups was at day 38 when the

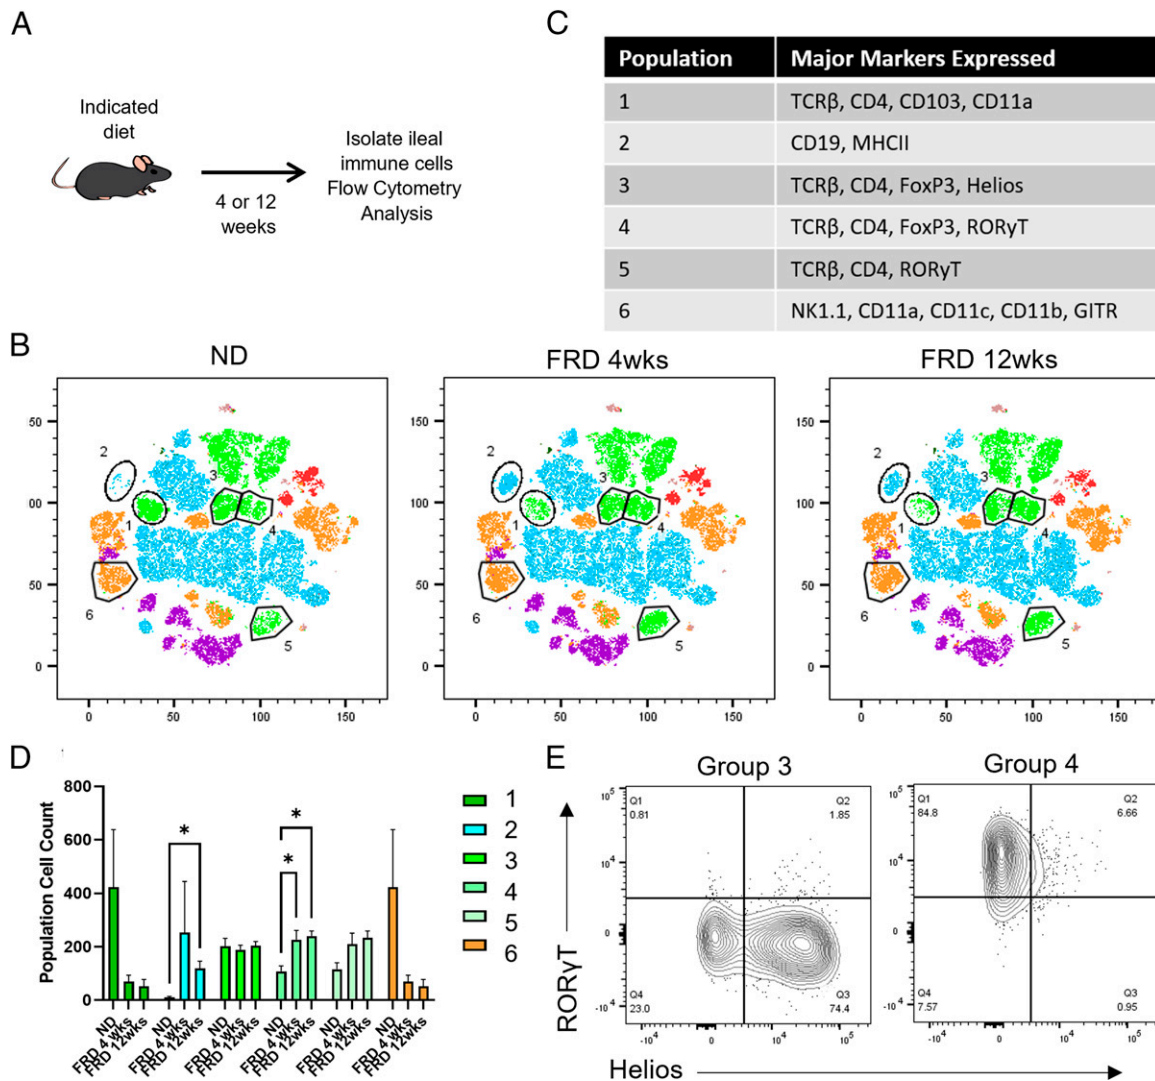

**FIGURE 4. An FRD modulates immune populations in the ileal lamina propria.**

Mice were fed an FRD or ND for 4 or 12 wk before ileal lamina propria cells were isolated and analyzed by flow cytometry. tSNE analysis was performed on CD45<sup>+</sup> cells previously gated on lymphocytes and single cells. (A) Schematic of the experimental procedure. (B) tSNE and FlowSOM analysis of flow cytometry data. (C) Table of selected markers expressed by the indicated populations taken from the tSNE analysis. (D) The number of cells in the indicated populations in each diet group. (E) Two-dimensional plot of Helios and ROR $\gamma$ T in populations 3 and 4 from mice fed an FRD.  $n = 5$  per group, two-way ANOVA for bar graphs. \* $p < 0.05$ .

experiment was ended. At this time point, 4 wk FRD-fed mice had an average score of  $4.19 \pm 1.19$ , 12 wk FRD-fed mice had an average score of  $3.95 \pm 1.36$ , and ND-fed mice had an average score of  $3.36 \pm 1.22$ . We also found that there was a trend toward FRD-fed mice being more likely to succumb to disease than ND-fed controls (Fig. 7B). These data suggest that an FRD can have a subtle effect on disease severity and survival in EAE.

#### Effect of fructose-supplemented water on EAE disease severity

We further wanted to discern whether the source of fructose impacted disease severity because much excess fructose is consumed via sugar-sweetened beverages instead of food (10).

Thus, we gave mice either an ND with 30% w/v fructose-supplemented water or an ND or FRD with normal facility water for 6 wk prior to EAE induction by MOG<sub>35–55</sub>/CFA immunization (Fig. 7A). We found that for mice given fructose-supplemented water, they had disease onset at day  $8 \pm 1$  and peak disease at day 27, with an average EAE score of  $3.35 \pm 0.63$  at that time point (Fig. 7C). FRD-fed mice had disease onset at  $9 \pm 2$  and peak disease at day 15, with an average EAE score of  $3.17 \pm 1.03$  at that time point (Fig. 7C). ND-fed mice had disease onset at day  $9 \pm 2$  and peak disease at day 16, with an average EAE score of  $3.22 \pm 0.97$  at that time point (Fig. 7C). We also found that the survival rate was not significantly impacted by the route of fructose intake (Fig. 7C). Thus, these data



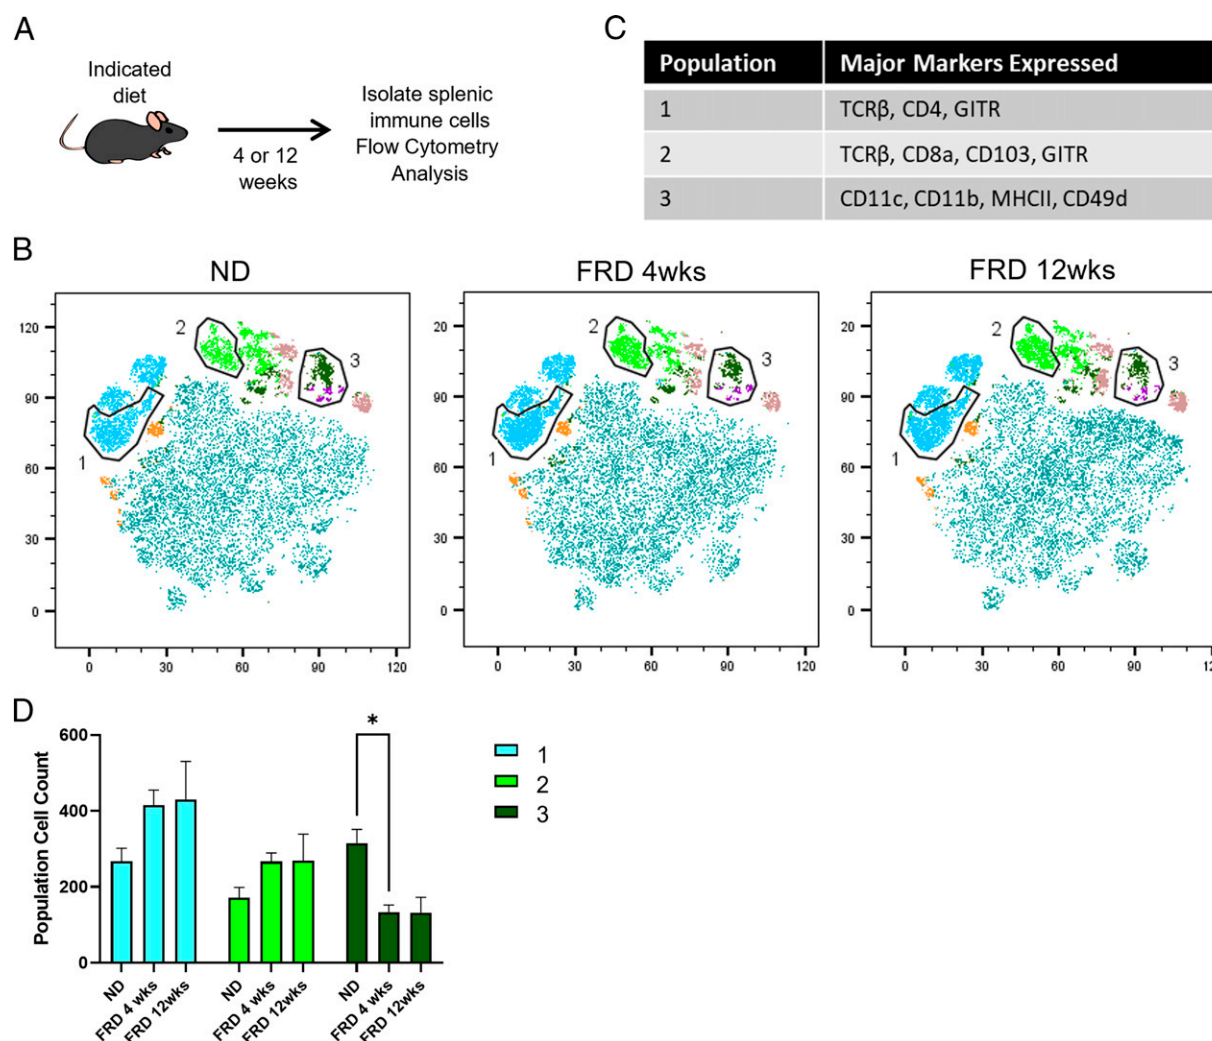

**FIGURE 5. An FRD may modulate some immune populations in the colonic lamina propria.**

Mice were fed an FRD or ND for 4 or 12 wk before colonic lamina propria cells were isolated and analyzed by flow cytometry. tSNE analysis was performed on CD45<sup>+</sup> cells previously gated on lymphocytes and single cells. (A) Schematic of the experimental procedure. (B) tSNE and FlowSOM analysis of flow cytometry data and (C) the number of cells in the indicated populations in each diet group. (D) Histograms from flow cytometry data depicting expression of selected identifying markers by the selected populations.  $n = 5$  per group, two-way ANOVA for bar graphs. \* $p < 0.05$ .

indicate that fructose-supplemented water had no effect on EAE disease onset or severity.

## DISCUSSION

A number of potential environmental factors have been linked with increased incidence of inflammatory diseases in developed countries, with a Western-style diet rich in simple sugars, fat, and protein emerging as one of the potential factors. Although the role of a high-fat diet in the modulation of gut microbiota, immune response, and MS/EAE has been investigated, the significance of high fructose in this context is unknown. Our data suggest that, in B6 mice, an FRD can modulate the composition of the gut microbiome such that the populations of bacteria are

distinctly different between ND- and FRD-fed mice. We also identified specific bacterial classes and genera that can be used as predictors of diet in a blinded random forest analysis. Looking at immune populations, we found alterations in the ileal lamina propria, where fructose is primarily absorbed. We also found immune modulation in the colonic lamina propria and spleen, suggesting that increased dietary fructose can have a physiologic effect both at, and outside of, the main area of uptake. Interestingly, we observed that despite modulating the gut microbiota and immune populations, an FRD had only a subtle effect on the disease severity in MOG<sub>35–55</sub>/CFA-induced EAE in B6 mice. Altogether, these data suggest that an FRD can influence the gut microbiome as well as mucosal and peripheral immune responses.

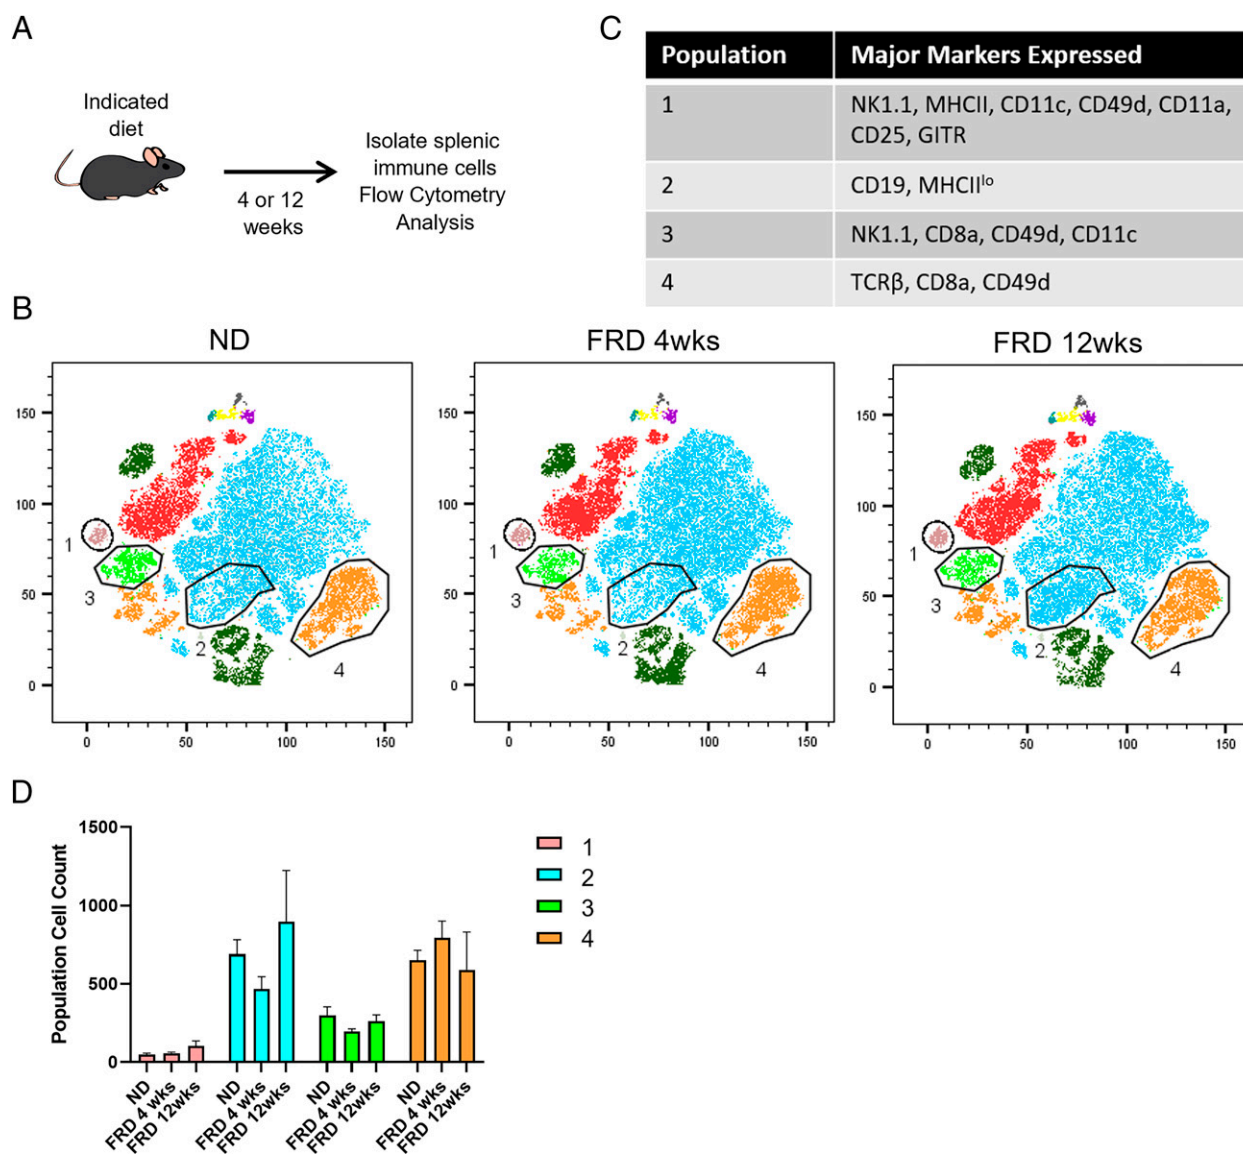

**FIGURE 6. An FRD can moderately modulate immune populations in the spleen over time.**

Four- to 6-wk-old mice were fed an FRD for 4 or 12 wk before splenic immune cells were isolated and analyzed by flow cytometry. **(A)** Schematic of the experiment. tSNE analysis was performed on CD45<sup>+</sup> cells previously gated on lymphocytes and single cells. **(B)** tSNE and FlowSOM analysis of splenic immune populations in each diet group. **(C)** Number of cells in selected populations in each diet group. **(D)** Histograms from flow cytometry depicting prominent identifying markers of the selected populations.  $n = 5$  per group, two-way ANOVA for bar graphs.

Several bacterial genera and species that were enriched in an FRD are particularly of interest, including *Collinsella*, *Olsenella*, and *Streptomyces*. *Collinsella*, which was identified in several tests, including random forest analysis, was enriched after an FRD. Chen et al. (38) reported that *Collinsella* was increased in the gut microbiomes of rheumatoid arthritis (RA) patients and strongly correlated with IL-17 production. They also found that treating mice with the species *Collinsella aerofaciens*, which we also found to be enriched in an FRD diet, led to increased gut permeability and disease severity in a collagen-induced arthritis mouse model of RA. *Collinsella* has also been associated with a low-fiber diet and high insulin levels in overweight/obese

pregnant people (39). Thus, an FRD can modulate immune responses through enrichment of *Collinsella*. *Olsenella* enrichment has been reported in the gut microbiomes of people with osteoporosis and was correlated with inflammatory markers (40). Another group found that *Olsenella* was highly enriched in patients with ulcerative colitis (41). In contrast, although *Streptomyces* was enriched after an FRD, these bacteria have been proposed as mediators of immunosuppression in human colon cancer, effectuating a decrease in cancer incidence through the production of antimicrobial/antiproliferative compounds (42, 43). More recently, metabolites produced by *Streptomyces* have also been found to mediate anti-inflammatory effects in microglia (44).

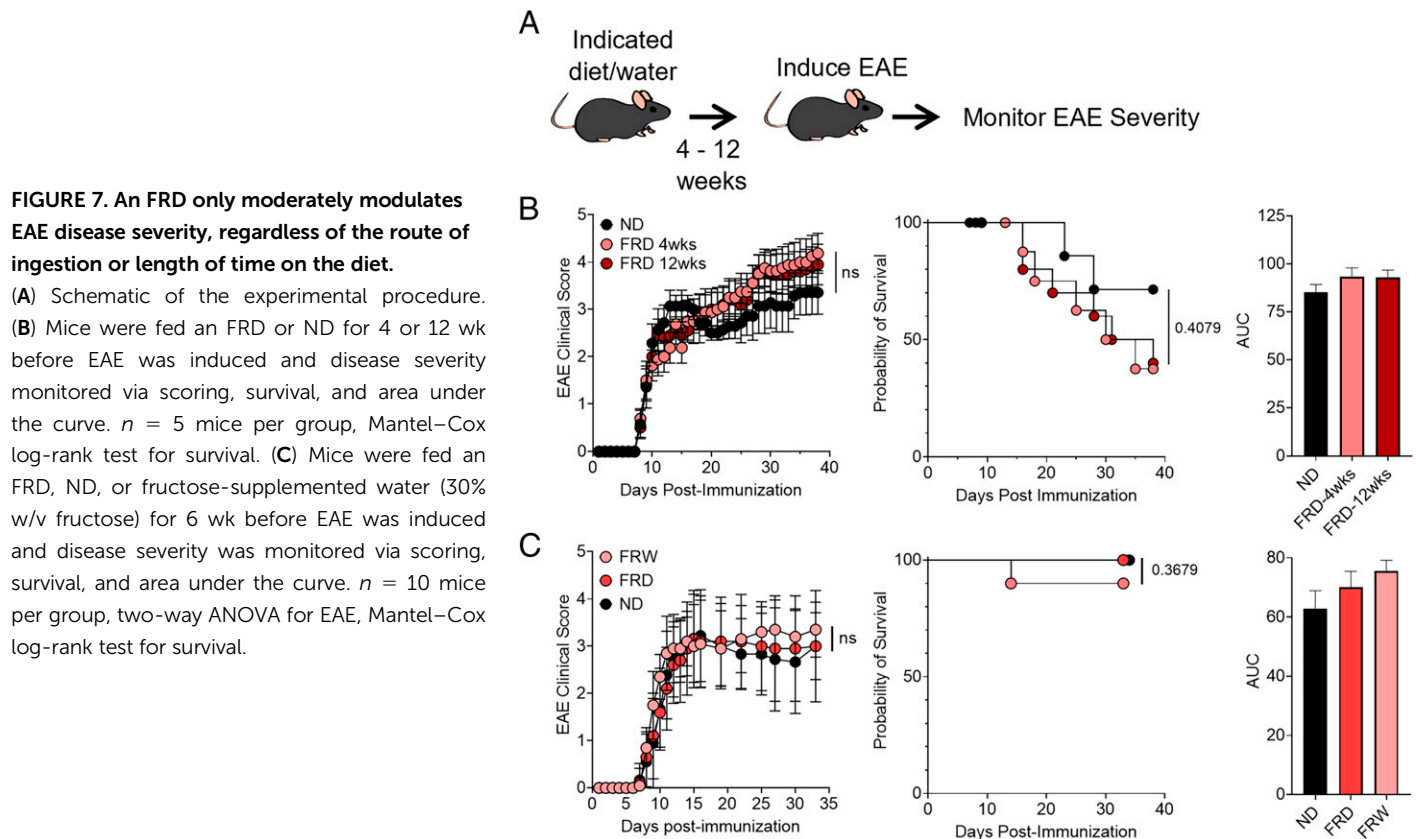

**FIGURE 7. An FRD only moderately modulates EAE disease severity, regardless of the route of ingestion or length of time on the diet.**

(A) Schematic of the experimental procedure. (B) Mice were fed an FRD or ND for 4 or 12 wk before EAE was induced and disease severity monitored via scoring, survival, and area under the curve.  $n = 5$  mice per group, Mantel–Cox log-rank test for survival. (C) Mice were fed an FRD, ND, or fructose-supplemented water (30% w/v fructose) for 6 wk before EAE was induced and disease severity was monitored via scoring, survival, and area under the curve.  $n = 10$  mice per group, two-way ANOVA for EAE, Mantel–Cox log-rank test for survival.

Taken together, these results suggest that an FRD promotes the expansion of gut bacteria with the potential to induce a proinflammatory environment. However, this is mixed with increases in potentially anti-inflammatory microbes, which may help balance the inflammatory properties of other enriched bacterial genera. Future studies utilizing specific strains of *Collinsella*, *Olsenella*, and *Streptomyces* enriched in mice on an FRD will help to answer whether they are proinflammatory or anti-inflammatory.

Several bacterial genera had reduced abundance in an FRD compared with an ND, with *Prevotella*, *Chryseobacterium*, *Porphyromonas*, and *Muribaculum* showing lower relative abundance in FRD-fed mice. We and others have previously found that *Prevotella* is depleted in the gut microbiome of MS patients, and our group has shown that treatment with *Prevotella histicola* specifically can ameliorate disease severity in a mouse model of MS (45–47). Furthermore, Falcone and colleagues (47) analyzed the microbiome and Th17 levels in mucosal biopsies of MS patients and correlated these indices with disease severity. They found that patients with severe MS showed a low abundance of *Prevotella*, and levels of Th17 cells were inversely correlated with the relative abundance of *Prevotella*. Additionally, disease-modifying therapies have been shown to restore levels of *Prevotella* in MS patients. Thus, many studies in MS patients point toward a beneficial role of *Prevotella* in the context of MS. However, some reports have also linked *Prevotella* with chronic inflammation in RA, metabolic disease, and intestinal dysbiosis,

suggesting either a differential effect of different species or an effect dependent on the environment (48, 49). *Chryseobacterium* species are common colonizing bacteria with low virulence. Their presence in clinical samples usually represents colonization and not infection, suggesting that their depletion in FRD-fed mice may represent a dysbiotic state (50). Regarding *Porphyromonas*, the species most represented in these mice included *P. crevoricaricis*, *P. gingivalis*, and *P. asaccharolytica*. In contrast, *P. gingivalis*, which has been associated with the pathogenesis of multiple diseases, including periodontitis, Alzheimer's disease, nonalcoholic fatty liver disease, and RA, was not present (51–54). Additionally, *P. crevoricaricis* and *P. gingivalis* share <5% DNA–DNA homology with other strains of *Porphyromonas* and produce high levels of short-chain fatty acids such as propionic and butyric acids (55). These short-chain fatty acids are generally considered beneficial, with propionic acid shown to lower fatty acid content in the liver and plasma, help reduce food intake, and mediate immunosuppression (56). Butyric acid can increase mucosal tight junction protein expression and has been shown to ameliorate mucosal inflammation and oxidative stress (57, 58). Overall, this may suggest that the species of *Porphyromonas* being depleted in FRD-fed mice might be beneficial to gut health. Thus, reduced abundance of these bacteria may be detrimental to overall gut homeostasis in FRD-fed mice. Besides these bacteria, *Muribaculum* also had reduced abundance in FRD-fed mice. This genus has been linked with

anti-inflammatory responses in the host, as highlighted by its reduced abundance in mice with Crohn's disease (59). Additionally, another group found that *Muribaculum* was depleted in mice fed a Western-style diet while juvenile, even after 8 wk of being fed normal chow (60). Although this study did not include exact dietary controls, as the normal chow and fructose-enriched diets have different dietary bases, the mice used for experiments were littermate controls. Additionally, bedding from each soiled cage was mixed between all cages for at least a week prior to the diet switch to normalize the microbiome between experimental groups and reduce variability due to the cage effect. Cage bedding mixing has been shown to be the most effective method for minimizing inter-individual variability when cohousing is not an option due to the study design (61). Also, as fructose is an overwhelming component of the FRD, we expect it to be a major driver of the microbiota changes. However, we cannot rule out the effect of other dietary components besides fructose for some of the microbial shifts observed in our study. Taken together, these results suggest that the overall composition of the gut microbiome is altered when mice are fed an FRD, with a reduced abundance of potentially beneficial bacteria and enrichment of inflammation-associated bacteria.

To investigate the intestinal immune response to an FRD over a short and long term, we first analyzed the small intestinal lamina propria, as it is the main site of fructose absorption in the gut (62). We observed enrichment of a Helios<sup>+</sup>RORγt<sup>+</sup>Foxp3<sup>+</sup>CD4<sup>+</sup> Treg population but not a Helios<sup>+</sup>Foxp3<sup>+</sup>CD4<sup>+</sup> Treg population uniquely in the ileum of FRD-fed mice. Interestingly, Helios is suggested to be a marker for thymic-derived Tregs, and thus higher levels of only Helios<sup>+</sup>RORγt<sup>+</sup>Foxp3<sup>+</sup>CD4<sup>+</sup> T cells in FRD-fed mice suggest a diet/microbiota-induced origin for this population (63–65). RORγt is the lineage-defining transcription factor for Th17 T cells and thus, Tregs expressing RORγt have been thought to be inflammatory as well. Several studies in human PBMCs have suggested that these Foxp3 and RORγt double-expressing Tregs can secrete IL-17 and have reduced suppressive capacity (66, 67). Recently, however, Tregs expressing RORγt concurrently with Foxp3 have been identified in the colonic lamina propria (68). These RORγt<sup>+</sup> Tregs are thought to be an important regulatory population that is induced in response to particular gut microbes and can help regulate the immune response to those microbes (69, 70). These double-expressing cells have also been shown to be suppressive in the context of an adoptive T cell transfer model of colitis, although the role of these cells in the small intestine is not yet well characterized. Combined with previous studies showing that most diet-induced T cell modulation occurs in the small intestine, our study may suggest that Helios<sup>+</sup>RORγt<sup>+</sup>Foxp3<sup>+</sup>CD4<sup>+</sup> Tregs are potentially a diet-induced subset of CD4<sup>+</sup> T cells that are being enriched in response to an FRD itself or the subsequent microbiota alterations and might play a role in inflammation.

We also observed changes in an MHC II<sup>+</sup>CD19<sup>+</sup> B cell population, with a distinct enrichment of these cells in the

ileum of FRD-fed mice at an early time point (4 wk) but declining over time (12 wk). B cells have the potential to be APCs and, given the expression of MHC II in this population, they may be acting as APCs in this context as has been documented in other autoimmune and viral challenge models (71–73). Perhaps they could function as APCs for the RORγt<sup>+</sup> Tregs that were also enriched in this region of the lamina propria, although that has not been directly tested and they could be playing other roles. In contrast, we also observed a dramatic depletion of CD103<sup>+</sup>CD4<sup>+</sup> T cells in the ileum of FRD-fed mice compared with ND-fed controls at the early and late time points. These cells were also depleted in ileal and colonic biopsies of patients with active inflammation in ulcerative colitis or Crohn's disease (74). This CD103 expression is also consistent with a resident memory T cell phenotype, which may suggest a depletion and/or redistribution of this T cell subset after an FRD. Such a phenomenon has also been seen in tissue-resident memory CD4 T cells within a xenograft model of human cutaneous tissue (75). Taken together, these data suggest that immune population alterations occur in the ileum of mice fed an FRD and can take place within 4 wk of a dietary change. These alterations may be in response to dietary elements or microbiota shifts and may be either beneficial or detrimental to overall inflammation in the ileum.

In contrast to the small intestine, FRD-mediated immune modulation was less overt in the colon and spleen. However, there was enrichment of CD4<sup>+</sup> T cells with high GITR expression in the colonic lamina propria after an FRD. GITR expression on effector T cells is associated with enhanced activation, suggesting that there may be more activated T cells in the colon of FRD-fed mice compared with ND-fed mice (76). There were also increased numbers of CD103<sup>+</sup>CD8<sup>+</sup> T cells in the colon and CD49d<sup>+</sup>CD8<sup>+</sup> T cells in the spleen upon introduction of an FRD. CD103<sup>+</sup>CD8<sup>+</sup> T cells are reduced in inflammatory bowel disease patients such that they represent only 9% of T cells in inflamed biopsies compared with 42% of T cells in healthy biopsies (74). However, other studies have suggested that this population of cells may play a role in host tissue destruction during graft-versus-host disease (77). Additionally, in Crohn's disease, patients' CD103<sup>+</sup>CD8<sup>+</sup> tissue-resident memory cells have a distinct transcriptome change and begin expressing Th17-related genes such as CCL20, IL-22, and IL-26 (78). This may suggest that these cells could be playing an inflammatory role in the colon but that they have a different role in the ileum, where this population is significantly reduced. In the spleen, the expansion of CD49d<sup>+</sup>CD8<sup>+</sup> T cells was only temporary, as only mice on an FRD for 4 wk showed an increase, and no difference was observed in mice fed an FRD for 12 wk. CD49d is a marker of Ag-experienced T cells, suggesting that in the short term after introducing a new diet, there may be an expansion of T cells in response to new Ags in the diet or gut commensal bacteria, which then contracts again with time.

Looking at reduced immune populations, there was a population of potential dendritic cells or other innate cells expressing CD11b, CD11c, MHC II, and CD49d, which were reduced



upon the addition of an FRD in the colon. Due to limitations of the flow cytometry panel, there is little information about these cells. Still, it may suggest that other changes in innate populations within the lamina propria are also occurring in response to an FRD. In the spleen, there was also a population of CD19<sup>+</sup> MHC II<sup>lo</sup> B cells that were initially reduced after 4 wk on an FRD, but appeared at higher than ND levels in mice fed an FRD for 12 wk. Loss of MHC II expression in B cells is associated with differentiation into plasma cells, suggesting that this population may be a plasma cell population that responds to the dietary change, and/or the subsequent microbiota changes, over a more extended period (79).

Finally, we wanted to determine whether the observed microbiota and gut immune population shifts would affect disease outcomes in a mouse model of MS. Surprisingly, despite changes in the gut microbiota and immune populations, an FRD has no significant effect on EAE disease incidence, onset, or severity. Although 4 and 12 wk of exposure to an FRD resulted in a slight increase in overall disease severity and mortality, they were insignificant. As fructose is mostly consumed in liquid form (i.e., sugary drinks), we also tested whether delivering fructose through drinking water would modulate EAE. However, even changing the mode of delivery from solid (food pellet) to liquid (drinking water) had no significant effect on EAE disease. This was very intriguing, as we observed a significant modulation of gut microbiota and host immune responses in mice on an FRD. There are multiple possible explanations for the insignificant effect of an FRD on EAE disease, such as needing a longer exposure, synergism with other genetic and environmental factors, and the difference in fructose metabolism between humans and mice. However, it might be possible that a longer exposure of >20 wk or the presence of other risk factors, such as a susceptible genetic background, high-fat diet, sedentary lifestyle, or infection such as EBV, might be required for observing any significant effect on disease. Another possible explanation is the high metabolism rate of mice, which is higher than in humans (80). In the human setting, high fructose intake may be a more pertinent issue, especially in conjunction with a Western diet and the known metabolic and systemic inflammatory problems that may arise from such a diet (33, 35, 81, 82). Additionally, it is possible that a mild to moderate EAE in our model might have helped to discern differences between dietary groups better. Different doses of MOG<sub>35–55</sub> peptide ranging from 100 to 300 µg/mouse, CFA ranging from 200 to 400 µg/ml, and PTX dose ranging from 100 to 400 ng/mouse have been reported for induction of EAE (83–86). Despite using the lowest published dose of MOG<sub>35–55</sub> (100 µg/mice), CFA (200 µg/ml), and PTX (80 ng/mouse), we observed a severe EAE disease in our animal facility. The presence or absence of specific microbes (bacteria, fungi, and viruses) in the animal facility can influence disease severity. Thus, future studies with lower doses of MOG and/or adjuvants (CFA/PTX) to induce a mild to moderate disease might help to determine whether an FRD can modulate EAE disease. Ultimately, all of the aforementioned factors may need to be

investigated more thoroughly to determine whether an FRD can modulate EAE disease.

In summary, our data suggest that an FRD significantly influences gut microbiota, with a reduced abundance of beneficial bacteria and enrichment of potentially proinflammatory bacteria. This gut dysbiosis can lead to modulation of immune responses in the gut and periphery. However, the subtle effect of an FRD on the EAE disease phenotype suggests that either an FRD cannot modulate disease severity in MS/EAE or it synergizes with other environmental and genetic factors to influence the pathobiology of MS. Future studies investigating these complex interactions might provide a better explanation of the role of an FRD in MS/EAE.

## DISCLOSURES

A.K.M. is one of the inventors of a technology claiming the use of *Prevotella histicola* to treat autoimmune diseases. A.K.M. received royalties from the Mayo Clinic (paid by Evelo Biosciences). However, no funds or products from the patent were used in the current study. The other authors have no financial conflicts of interest.

## REFERENCES

1. GBD 2016 Multiple Sclerosis Collaborators. 2019. Global, regional, and national burden of multiple sclerosis 1990–2016: a systematic analysis for the Global Burden of Disease Study 2016. *Lancet Neurol.* 18: 269–285.
2. Lazibat, I., M. Rubinić Majdak, and S. Županić. 2018. Multiple sclerosis: new aspects of immunopathogenesis. *Acta Clin. Croat.* 57: 352–361.
3. Waubant, E., R. Lucas, E. Mowry, J. Graves, T. Olsson, L. Alfredsson, and A. Langer-Gould. 2019. Environmental and genetic risk factors for MS: an integrated review. *Ann. Clin. Transl. Neurol.* 6: 1905–1922.
4. Mangalam, A. K., M. Yadav, and R. Yadav. 2021. The emerging world of microbiome in autoimmune disorders: opportunities and challenges. *Indian J. Rheumatol.* 16: 57–72.
5. Freedman, S. N., S. K. Shahi, and A. K. Mangalam. 2018. The “gut feeling”: breaking down the role of gut microbiome in multiple sclerosis. *Neurotherapeutics* 15: 109–125.
6. Manzel, A., D. N. Muller, D. A. Hafler, S. E. Erdman, R. A. Linker, and M. Kleinewietfeld. 2014. Role of “Western diet” in inflammatory autoimmune diseases. *Curr. Allergy Asthma Rep.* 14: 404.
7. Shahi, S. K., S. Ghimire, P. Lehman, and A. K. Mangalam. 2022. Obesity induced gut dysbiosis contributes to disease severity in an animal model of multiple sclerosis. *Front. Immunol.* 13: 966417.
8. Rizkalla, S. W. 2010. Health implications of fructose consumption: a review of recent data. *Nutr. Metab. (Lond.)* 7: 82.
9. Ter Horst, K. W., and M. J. Serlie. 2017. Fructose consumption, lipogenesis, and non-alcoholic fatty liver disease. *Nutrients* 9: 981.
10. Hannou, S. A., D. E. Haslam, N. M. McKeown, and M. A. Herman. 2018. Fructose metabolism and metabolic disease. *J. Clin. Invest.* 128: 545–555.
11. Elaković, I., S. Kovačević, D. Vojnović Milutinović, A. Nikolić-Kokić, A. M. Glban, M. Spasić, L. Tappy, A. Djordjevic, G. Matić, and J. Brkljačić. 2020. Fructose consumption affects glucocorticoid signaling in the liver of young female rats. *Nutrients* 12: 3470.



12. Strober, J. W., and M. J. Brady. 2019. Dietary fructose consumption and triple-negative breast cancer incidence. *Front. Endocrinol. (Lausanne)* 10: 367.
13. Fan, X., H. Liu, M. Liu, Y. Wang, L. Qiu, and Y. Cui. 2017. Increased utilization of fructose has a positive effect on the development of breast cancer. *PeerJ* 5: e3804.
14. Horne, R. G., Y. Yu, R. Zhang, N. Abdalqadir, L. Rossi, M. Surette, P. M. Sherman, and K. Adeli. 2020. High fat-high fructose diet-induced changes in the gut microbiota associated with dyslipidemia in Syrian hamsters. *Nutrients* 12: 3557.
15. Ferrere, G., A. Leroux, L. Wrzosek, V. Puchois, F. Gaudin, D. Ciocan, M. L. Renoud, S. Naveau, G. Perlemuter, and A. M. Cassard. 2016. Activation of Kupffer cells is associated with a specific dysbiosis induced by fructose or high fat diet in mice. *PLoS One* 11: e0146177.
16. Shahi, S. K., K. Zarei, N. V. Guseva, and A. K. Mangalam. 2019. Microbiota analysis using two-step PCR and next-generation 16S rRNA gene sequencing. *J. Vis. Exp.* (152): e59980.
17. Uritskiy, G. V., J. DiRuggiero, and J. Taylor. 2018. MetaWRAP—a flexible pipeline for genome-resolved metagenomic data analysis. *Microbiome* 6: 158.
18. Wood, D. E., J. Lu, and B. Langmead. 2019. Improved metagenomic analysis with Kraken 2. *Genome Biol.* 20: 257.
19. Lu, J., F. P. Breitwieser, P. Thielen, and S. L. Salzberg. 2017. Bracken: estimating species abundance in metagenomics data. *PeerJ Comput. Sci.* 3: e104.
20. Lee, M. 2022. bit: a multipurpose collection of bioinformatics tools. *F1000 Res.* 11: 122.
21. Jari Oksanen, F. G. B., R. Kindt, P. Legendre, P. R. Minchin, R. B. O'Hara, P. Solymos, M. H. H. Stevens, E. Szöcs, H. Wagner, et al. 2020. Community ecology package. <https://cran.r-project.org/web/packages/vegan/vegan.pdf>.
22. Kassambara, A. 2018. ggpubr: “ggplot2” based publication ready plots. Available at: <https://cran.r-project.org/web/packages/ggpubr/index.html>.
23. Ali, S. 2020. MicroVis. Available at: <https://github.com/microresearcher/MicroVis>.
24. Kursu, M. B., and W. R. Rudnicki. 2010. Feature selection with the Boruta package. *J. Stat. Softw.* 36: 1–13.
25. Weigmann, B., I. Tubbe, D. Seidel, A. Nicolaev, C. Becker, and M. F. Neurath. 2007. Isolation and subsequent analysis of murine lamina propria mononuclear cells from colonic tissue. *Nat. Protoc.* 2: 2307–2311.
26. Jensen, S. N., N. M. Cady, S. K. Shahi, S. R. Peterson, A. Gupta, K. N. Gibson-Corley, and A. K. Mangalam. 2021. Isoflavone diet ameliorates experimental autoimmune encephalomyelitis through modulation of gut bacteria depleted in patients with multiple sclerosis. *Sci. Adv.* 7: eabd4595.
27. FlowJo LLC. Downsample. Available at: <https://docs.flowjo.com/seqgeq/dimensionality-reduction/downsample/>.
28. Tyler, A. F., J. P. Mendoza, M. Firan, and N. J. Karandikar. 2013. CD8<sup>+</sup> T cells are required for glatiramer acetate therapy in autoimmune demyelinating disease. *PLoS One* 8: e66772.
29. Ghosh, T. S., S. Rampelli, I. B. Jeffery, A. Santoro, M. Neto, M. Capri, E. Giampieri, A. Jennings, M. Candela, S. Turroni, et al. 2020. Mediterranean diet intervention alters the gut microbiome in older people reducing frailty and improving health status: the NU-AGE 1-year dietary intervention across five European countries. *Gut* 69: 1218–1228.
30. Singh, R. K., H. W. Chang, D. Yan, K. M. Lee, D. Ucmak, K. Wong, M. Abrouk, B. Farahnik, M. Nakamura, T. H. Zhu, et al. 2017. Influence of diet on the gut microbiome and implications for human health. *J. Transl. Med.* 15: 73.
31. Riaz Rajoka, M. S., J. Shi, H. M. Mehwish, J. Zhu, Q. Li, D. Shao, Q. Huang, and H. Yang. 2017. Interaction between diet composition and gut microbiota and its impact on gastrointestinal tract health. *Food Sci. Hum. Wellness* 6: 121–130.
32. Leeming, E. R., A. J. Johnson, T. D. Spector, and C. I. Le Roy. 2019. Effect of diet on the gut microbiota: rethinking intervention duration. *Nutrients* 11: 2862.
33. Graham, L. C., J. M. Harder, I. Soto, W. N. de Vries, S. W. M. John, and G. R. Howell. 2016. Chronic consumption of a western diet induces robust glial activation in aging mice and in a mouse model of Alzheimer's disease. *Sci. Rep.* 6: 21568.
34. Cabral, D. J., J. I. Wurster, B. J. Korry, S. Penumatchu, and P. Belenky. 2020. Consumption of a Western-style diet modulates the response of the murine gut microbiome to ciprofloxacin. *mSystems* 5: e00317–20.
35. Benninghoff, A. D., K. J. Hintze, S. P. Monsanto, D. M. Rodriguez, A. H. Hunter, S. Phatak, J. J. Pestka, A. J. V. Wettere, and R. E. Ward. 2020. Consumption of the total Western diet promotes colitis and inflammation-associated colorectal cancer in mice. *Nutrients* 12: 544.
36. Chester, C., and H. T. Maecker. 2015. Algorithmic tools for mining high-dimensional cytometry data. *J. Immunol.* 195: 773–779.
37. Quintelier, K., A. Couckuyt, A. Emmaneel, J. Aerts, Y. Saeys, and S. Van Gassen. 2021. Analyzing high-dimensional cytometry data using FlowSOM. *Nat. Protoc.* 16: 3775–3801.
38. Chen, J., K. Wright, J. M. Davis, P. Jeraldo, E. V. Marietta, J. Murray, H. Nelson, E. L. Matteson, and V. Taneja. 2016. An expansion of rare lineage intestinal microbes characterizes rheumatoid arthritis. *Genome Med.* 8: 43.
39. Gomez-Arango, L. F., H. L. Barrett, S. A. Wilkinson, L. K. Callaway, H. D. McIntyre, M. Morrison, and M. Dekker Nitert. 2018. Low dietary fiber intake increases *Collinsella* abundance in the gut microbiota of overweight and obese pregnant women. *Gut Microbes* 9: 189–201.
40. Qin, Q., S. Yan, Y. Yang, J. Chen, H. Yan, T. Li, X. Gao, Y. Wang, A. Li, S. Wang, and S. Ding. 2021. The relationship between osteoporosis and intestinal microbes in the Henan province of China. *Front. Cell Dev. Biol.* 9: 752990.
41. Gryaznova, M. V., S. A. Solodskikh, A. V. Panevina, M. Y. Syromyatnikov, Y. D. Dvoretzkaya, T. N. Sviridova, E. S. Popov, and V. N. Popov. 2021. Study of microbiome changes in patients with ulcerative colitis in the Central European part of Russia. *Heliyon* 7: e06432.
42. Bolourian, A., and Z. Mojtahedi. 2018. *Streptomyces*, shared microbiome member of soil and gut, as “old friends” against colon cancer. *FEMS Microbiol. Ecol.* 94: fty120 <https://doi.org/10.1093/femsec/fty120>.
43. Bolourian, A., and Z. Mojtahedi. 2018. Immunosuppressants produced by *Streptomyces*: evolution, hygiene hypothesis, tumour rapalog resistance and probiotics. *Environ. Microbiol. Rep.* 10: 123–126.
44. Gegunde, S., A. Alfonso, R. Alvarino, N. Pérez-Fuentes, and L. M. Botana. 2021. Anhydroexfoliamycin, a *Streptomyces* secondary metabolite, mitigates microglia-driven inflammation. *ACS Chem. Neurosci.* 12: 2336–2346.
45. Chen, J., N. Chia, K. R. Kalari, J. Z. Yao, M. Novotna, M. M. Paz Soldan, D. H. Luckey, E. V. Marietta, P. R. Jeraldo, X. Chen, et al. 2016. Multiple sclerosis patients have a distinct gut microbiota compared to healthy controls. *Sci. Rep.* 6: 28484.
46. Shahi, S. K., S. N. Freedman, A. C. Murra, K. Zarei, R. Sompallae, K. N. Gibson-Corley, N. J. Karandikar, J. A. Murray, and A. K. Mangalam. 2019. *Prevotella histicola*, a human gut commensal, is as potent as COPAXONE® in an animal model of multiple sclerosis. *Front. Immunol.* 10: 462.
47. Cosorich, I., G. Dalla-Costa, C. Sorini, R. Ferrarese, M. J. Messina, J. Dolpady, E. Radice, A. Mariani, P. A. Testoni, F. Canducci, et al. 2017. High frequency of intestinal T<sub>H</sub>17 cells correlates with microbiota alterations and disease activity in multiple sclerosis. *Sci. Adv.* 3: e1700492.
48. Iljazovic, A., L. Amend, E. J. C. Galvez, R. de Oliveira, and T. Strowig. 2021. Modulation of inflammatory responses by gastrointestinal *Prevotella*

- spp.—from associations to functional studies. *Int. J. Med. Microbiol.* 311: 151472.
49. Larsen, J. M. 2017. The immune response to *Prevotella* bacteria in chronic inflammatory disease. *Immunology* 151: 363–374.
  50. Booth, J. 2007. *Chryseobacterium* and related genera infections. In *xPharm: The Comprehensive Pharmacology Reference*. S. J. Enna, and D. B. Bylund, eds. Elsevier, New York, p. 1–4.
  51. Xu, W., W. Zhou, H. Wang, and S. Liang. 2020. Roles of *Porphyromonas gingivalis* and its virulence factors in periodontitis. *Adv. Protein Chem. Struct. Biol.* 120: 45–84.
  52. Wang, T., T. Ishikawa, M. Sasaki, and T. Chiba. 2022. Oral and gut microbial dysbiosis and non-alcoholic fatty liver disease: the central role of *Porphyromonas gingivalis*. *Front. Med. (Lausanne)* 9: 822190.
  53. Olsen, I. 2021. *Porphyromonas gingivalis*-induced neuroinflammation in Alzheimer's disease. *front. neurosci.* 15: 691016.
  54. Hamamoto, Y., K. Ouhara, S. Munenaga, M. Shoji, T. Ozawa, J. Hisatsune, I. Kado, M. Kajiya, S. Matsuda, T. Kawai, et al. 2020. Effect of *Porphyromonas gingivalis* infection on gut dysbiosis and resultant arthritis exacerbation in mouse model. *Arthritis Res. Ther.* 22: 249.
  55. Hirasawa, M., and K. Takada. 1994. *Porphyromonas gingivicanis* sp. nov. and *Porphyromonas crevioricanis* sp. nov., isolated from beagles. *Int. J. Syst. Bacteriol.* 44: 637–640.
  56. Al-Lahham, S. H., M. P. Peppelenbosch, H. Roelofsen, R. J. Vonk, and K. Venema. 2010. Biological effects of propionic acid in humans; metabolism, potential applications and underlying mechanisms. *Biochim. Biophys. Acta* 1801: 1175–1183.
  57. Xu, H.-M., H.-L. Huang, J. Xu, J. He, C. Zhao, Y. Peng, H.-L. Zhao, W.-Q. Huang, C.-Y. Cao, Y.-J. Zhou, et al. 2021. Cross-talk between butyric acid and gut microbiota in ulcerative colitis following fecal microbiota transplantation. *Front. Microbiol.* 12: 658292.
  58. Parada Venegas, D., M. K. De la Fuente, G. Landskron, M. J. González, R. Quera, G. Dijkstra, H. J. M. Harmsen, K. N. Faber, and M. A. Hermoso. 2019. Short chain fatty acids (SCFAs)-mediated gut epithelial and immune regulation and its relevance for inflammatory bowel diseases. *Front. Immunol.* 10: 277.
  59. Dobranowski, P. A., C. Tang, J. P. Sauvé, S. C. Menzies, and L. M. Sly. 2019. Compositional changes to the ileal microbiome precede the onset of spontaneous ileitis in SHIP deficient mice. *Gut Microbes* 10: 578–598.
  60. McNamara, M. P., J. M. Singleton, M. D. Cadney, P. M. Ruegger, J. Borneman, and T. Garland. 2021. Early-life effects of juvenile Western diet and exercise on adult gut microbiome composition in mice. *J. Exp. Biol.* 224: jeb239699.
  61. Miyoshi, J., V. Leone, K. Nobutani, M. W. Musch, K. Martinez-Guryn, Y. Wang, S. Miyoshi, A. M. Bobe, A. M. Eren, and E. B. Chang. 2018. Minimizing confounders and increasing data quality in murine models for studies of the gut microbiome. *PeerJ* 6: e5166.
  62. Shi, Y. N., Y. J. Liu, Z. Xie, and W. J. Zhang. 2021. Fructose and metabolic diseases: too much to be good. *Chin. Med. J. (Engl.)* 134: 1276–1285.
  63. Kim, K. S., S. W. Hong, D. Han, J. Yi, J. Jung, B. G. Yang, J. Y. Lee, M. Lee, and C. D. Surh. 2016. Dietary antigens limit mucosal immunity by inducing regulatory T cells in the small intestine. *Science* 351: 858–863.
  64. Arroyo Hornero, R., I. Hamad, B. Côte-Real, and M. Kleinewietfeld. 2020. The impact of dietary components on regulatory T cells and disease. *Front. Immunol.* 11: 253.
  65. Thornton, A. M., J. Lu, P. E. Korty, Y. C. Kim, C. Martens, P. D. Sun, and E. M. Shevach. 2019. Helios<sup>+</sup> and Helios<sup>-</sup> Treg subpopulations are phenotypically and functionally distinct and express dissimilar TCR repertoires. *Eur. J. Immunol.* 49: 398–412.
  66. Ayyoub, M., F. Deknuydt, I. Raimbaud, C. Dousset, L. Leveque, G. Birole, and D. Valmori. 2009. Human memory FOXP3<sup>+</sup> Tregs secrete IL-17 ex vivo and constitutively express the T<sub>H</sub>17 lineage-specific transcription factor ROR $\gamma$ t. *Proc. Natl. Acad. Sci. USA* 106: 8635–8640.
  67. Ueno, A., H. Jijon, R. Chan, K. Ford, C. Hirota, G. G. Kaplan, P. L. Beck, M. Iacucci, M. Fort Gasia, H. W. Barkema, et al. 2013. Increased prevalence of circulating novel IL-17 secreting Foxp3-expressing CD4<sup>+</sup> T cells and defective suppressive function of circulating Foxp3<sup>+</sup> regulatory cells support plasticity between Th17 and regulatory T cells in inflammatory bowel disease patients. *Inflamm. Bowel Dis.* 19: 2522–2534.
  68. Yang, B. H., S. Hagemann, P. Mamareli, U. Lauer, U. Hoffmann, M. Beckstette, L. Föhse, I. Prinz, J. Pezoldt, S. Suerbaum, et al. 2016. Foxp3<sup>+</sup> T cells expressing ROR $\gamma$ t represent a stable regulatory T-cell effector lineage with enhanced suppressive capacity during intestinal inflammation. *Mucosal Immunol.* 9: 444–457.
  69. Sefik, E., N. Geva-Zatorsky, S. Oh, L. Konnikova, D. Zemmour, A. M. McGuire, D. Burzyn, A. Ortiz-Lopez, M. Lobera, J. Yang, et al. 2015. Individual intestinal symbionts induce a distinct population of ROR $\gamma$ <sup>+</sup> regulatory T cells. *Science* 349: 993–997.
  70. Bhaumik, S., M. E. Mickael, M. Moran, M. Spell, and R. Basu. 2021. ROR $\gamma$ t promotes Foxp3 expression by antagonizing the effector program in colonic regulatory T cells. *J. Immunol.* 207: 2027–2038.
  71. Barnett, L. G., H. M. A. Simkins, B. E. Barnett, L. L. Korn, A. L. Johnson, E. J. Wherry, G. F. Wu, and T. M. Laufer. 2014. B cell antigen presentation in the initiation of follicular helper T cell and germinal center differentiation. *J. Immunol.* 192: 3607–3617.
  72. Whitmire, J. K., M. S. Asano, S. M. Kaech, S. Sarkar, L. G. Hannum, M. J. Shlomchik, and R. Ahmed. 2009. Requirement of B cells for generating CD4<sup>+</sup> T cell memory. *J. Immunol.* 182: 1868–1876.
  73. Constant, S. L. 1999. B lymphocytes as antigen-presenting cells for CD4<sup>+</sup> T cell priming in vivo. *J. Immunol.* 162: 5695–5703.
  74. Roosenboom, B., P. J. Wahab, C. Smids, M. J. M. Groenen, E. van Koolwijk, E. G. van Lochem, and C. S. Horjus Talabur Horje. 2019. Intestinal CD103<sup>+</sup>CD4<sup>+</sup> and CD103<sup>+</sup>CD8<sup>+</sup> T-cell subsets in the gut of inflammatory bowel disease patients at diagnosis and during follow-up. *Inflamm. Bowel Dis.* 25: 1497–1509.
  75. Klicznik, M. M., P. A. Morawski, B. Höllbacher, S. R. Varkhande, S. J. Motley, L. Kuri-Cervantes, E. Goodwin, M. D. Rosenblum, S. A. Long, G. Bracht, et al. 2019. Human CD4<sup>+</sup>CD103<sup>+</sup> cutaneous resident memory T cells are found in the circulation of healthy individuals. *Sci. Immunol.* 4: eaav8995.
  76. van Olfen, R. W., N. Koning, K. P. J. M. van Gisbergen, F. M. Wensveen, R. M. Hoek, L. Boon, J. Hamann, R. A. W. van Lier, and M. A. Nolte. 2009. GITR triggering induces expansion of both effector and regulatory CD4<sup>+</sup> T cells in vivo. *J. Immunol.* 182: 7490–7500.
  77. El-Asady, R., R. Yuan, K. Liu, D. Wang, R. E. Gress, P. J. Lucas, C. B. Drachenberg, and G. A. Hadley. 2005. TGF- $\beta$ -dependent CD103 expression by CD8<sup>+</sup> T cells promotes selective destruction of the host intestinal epithelium during graft-versus-host disease. *J. Exp. Med.* 201: 1647–1657.
  78. Bottois, H., M. Ngollo, N. Hammoudi, T. Courau, J. Bonnereau, V. Charldiny, C. Grand, B. Gergaud, M. Allez, and L. Le Bourhis. 2020. KLRG1 and CD103 expressions define distinct intestinal tissue-resident memory CD8 T cell subsets modulated in Crohn's disease. *Front. Immunol.* 11: 896.
  79. Yoon, H. S., C. D. Scharer, P. Majumder, C. W. Davis, R. Butler, W. Zinzow-Kramer, I. Skountzou, D. G. Koutsouanos, R. Ahmed, and J. M. Boss. 2012. ZBTB32 is an early repressor of the CIITA and MHC class II gene expression during B cell differentiation to plasma cells. *J. Immunol.* 189: 2393–2403.
  80. Fuller, K. N. Z., and J. P. Thyfault. 2021. Barriers in translating pre-clinical rodent exercise metabolism findings to human health. *J. Appl. Physiol.* (1985) 130: 182–192.
  81. Newman, T. M., C. A. Shively, T. C. Register, S. E. Appt, H. Yadav, R. R. Colwell, B. Fanelli, M. Dadlani, K. Graubics, U. T. Nguyen, et al. 2021. Diet, obesity, and the gut microbiome as determinants modulating metabolic outcomes in a non-human primate model. *Microbiome* 9: 100.

82. Ruigrok, S. R., M. R. Abbink, J. Geertsema, J. E. Kuindersma, N. Stöberl, E. M. van der Beek, P. J. Lucassen, L. Schipper, and A. Korosi. 2021. Effects of early-life stress, postnatal diet modulation and long-term Western-style diet on peripheral and central inflammatory markers. *Nutrients* 13: 288.
83. Chen, C., W. Zhang, T. Zhou, Q. Liu, C. Han, Z. Huang, S. Chen, Q. Mei, C. Zhang, K. Zhang, et al. 2022. Vitamin B5 rewires Th17 cell metabolism via impeding PKM2 nuclear translocation. *Cell Rep.* 41: 111741.
84. Damasceno, L. E. A., D. S. Prado, F. P. Veras, M. M. Fonseca, J. E. Toller-Kawahisa, M. H. Rosa, G. A. Públio, T. V. Martins, F. S. Ramalho, A. Waisman, et al. 2020. PKM2 promotes Th17 cell differentiation and auto-immune inflammation by fine-tuning STAT3 activation. *J. Exp. Med.* 217: e20190613.
85. Hall, J. A., M. Pokrovskii, L. Kroehling, B. R. Kim, S. Y. Kim, L. Wu, J. Y. Lee, and D. R. Littman. 2022. Transcription factor ROR $\alpha$  enforces stability of the Th17 cell effector program by binding to a *Rorc* cis-regulatory element. *Immunity* 55: 2027–2043.e9.
86. Yogev, N., T. Bedke, Y. Kobayashi, L. Brockmann, D. Lukas, T. Regen, A. L. Croxford, A. Nikolav, N. Hövelmeyer, E. von Stebut, et al. 2022. CD4<sup>+</sup> T-cell-derived IL-10 promotes CNS inflammation in mice by sustaining effector T cell survival. *Cell Rep.* 38: 110565.
